# Supplementary material
Source: HighWire-hosted journal article supplement (https://jnm.snmjournals.org/highwire/filestream/95071/field_highwire_adjunct_files/0/179994_Supplemental_Data.pdf)
Supplement: 179994_Supplemental_Data.pdf [file 179994_Supplemental_Data.pdf]

**SUPPLEMENTAL TABLE 1. Comparison of SUV (SD) measures in different tumor types.**

| <b>Tumor</b>            | <b><sup>11</sup>C-AMT</b> | <b><sup>18</sup>F-FETrp</b> | <b><sup>18</sup>F-FETrp/<sup>11</sup>C-AMT</b> |
|-------------------------|---------------------------|-----------------------------|------------------------------------------------|
| Glioblastoma (n=4)      | 0.81 (0.52)               | 1.17 (0.28)                 | 1.9 (0.9)                                      |
| Breast metastasis (n=4) | 0.58 (0.11)               | 0.70 (0.10)                 | 1.3 (0.4)                                      |
| Lung metastasis (n=2)   | 0.14 (0.01)               | 0.51 (0.05)                 | 3.6 (0.3)                                      |

**SUPPLEMENTAL TABLE 2. Residence time (hours) and corresponding standard deviation for <sup>18</sup>F-FETrp obtained from PET imaging based on mouse data (n=6).**

|                    |                |                  |                |
|--------------------|----------------|------------------|----------------|
| <b>Bladder</b>     | 0.2402 (0.065) | <b>Lungs</b>     | 0.0129 (0.003) |
| <b>Brain</b>       | 0.0168 (0.002) | <b>Marrow</b>    | 0.0076 (0.001) |
| <b>Gallbladder</b> | 0.0630 (0.017) | <b>Muscle</b>    | 0.6607 (0.058) |
| <b>Heart</b>       | 0.0221 (0.003) | <b>Pancreas</b>  | 0.0792 (0.001) |
| <b>Kidneys</b>     | 0.0251 (0.002) | <b>Spleen</b>    | 0.0223 (0.002) |
| <b>Liver</b>       | 0.0617 (0.031) | <b>Remainder</b> | 1.4317 (0.004) |

**SUPPLEMENTAL TABLE 3. Radiation absorbed dose estimates for <sup>18</sup>F-FETrp administration in adult subjects.**

| <b>Target Organ</b>  | <b>Dose (μGy/MBq)</b> |                     |
|----------------------|-----------------------|---------------------|
|                      | <b>Adult Male</b>     | <b>Adult Female</b> |
| Adrenal              | 13.1                  | 16.3                |
| Brain                | 5.3                   | 6.2                 |
| Breast               | 7.9                   | 9.7                 |
| Gallbladder Wall     | 13.9                  | 16.5                |
| Heart wall           | 15.2                  | 18.2                |
| LL intestine         | 15.3                  | 19.1                |
| UL intestine         | 14.4                  | 17.8                |
| Kidneys              | 22.7                  | 25.6                |
| Liver                | 13.0                  | 17.0                |
| Lungs                | 8.1                   | 10.4                |
| Muscle               | 10.7                  | 14.5                |
| Osteogenic cells     | 14.4                  | 18.2                |
| Ovaries              | -                     | 19.4                |
| Pancreas             | 151.0                 | 168.0               |
| Red marrow           | 10.4                  | 12.4                |
| Skin                 | 7.3                   | 9.4                 |
| Small Intestine      | 25.3                  | 29.1                |
| Spleen               | 13.4                  | 16.5                |
| Stomach              | 13.8                  | 16.8                |
| Testes               | 11.3                  | -                   |
| Thymus               | 9.8                   | 12.0                |
| Thyroid              | 9.5                   | 11.0                |
| Urinary bladder wall | 124.0                 | 170.0               |
| Uterus               | -                     | 23.3                |
| <b>Total body</b>    | <b>28.6</b>           | <b>34.9</b>         |

**SUPPLEMENTAL FIGURE 1.** Hematoxylin and eosin staining of patient-derived xenograft tumors. Scale bars are 100 microns.

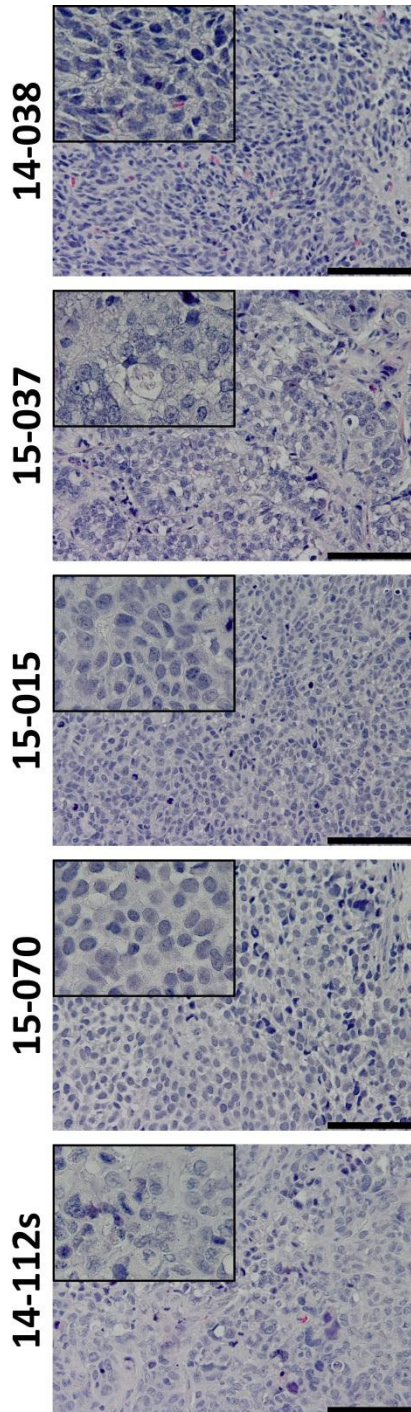

Hematoxylin and eosin staining was performed following standard protocol (*Fischer AH, Jacobson KA, Rose J, Zeller R. Hematoxylin and eosin staining of tissue and cell sections. CSH Protoc. 2008;2008:pdb prot4986.*) The 14-038 glioblastoma specimen showed densely packed ovoid cells with frequent atypical mitotic figures. The majority of nuclei were pleomorphic and hyperchromatic and demonstrated an increased nucleus-to-cytoplasm (N/C) ratio. Rare large multinucleated cells were also found. The 15-037 glioblastoma specimen showed densely packed cells. Many of the cells had hyperchromatic nuclei, while the remaining cell nuclei were relatively clear with prominent nucleoli. The nucleus/cytoplasm ratio was increased, and several cells per high-powered field show pyknosis. The 15-015 breast cancer brain metastasis specimen showed small cells loosely arranged against background stroma. Numerous mitotic figures are seen, many of which are abnormal. Nuclei comprise almost the entire cell volume. The 15-070 breast cancer brain metastasis specimen showed large cells loosely arranged against background stroma. Nuclei show a moderate degree of pleomorphism and increased nucleus/cytoplasm ratio. Rare abnormal mitoses are also seen. The 14-112S NSCLC brain metastasis specimen showed small areas of densely packed cells separated by bands of loose stroma. The tissue appears grossly disorganized without clear cell polarity. The cells show a large degree of pleiotropy with hyperchromatic nuclei and increased nucleus/cytoplasm ratio. Abnormal giant cells are present, as are rare pyknotic nuclei.

**SUPPLEMENTAL FIGURE 2.** Immunohistochemical staining of patient-derived xenograft tumors. Scale bars are 50 microns.

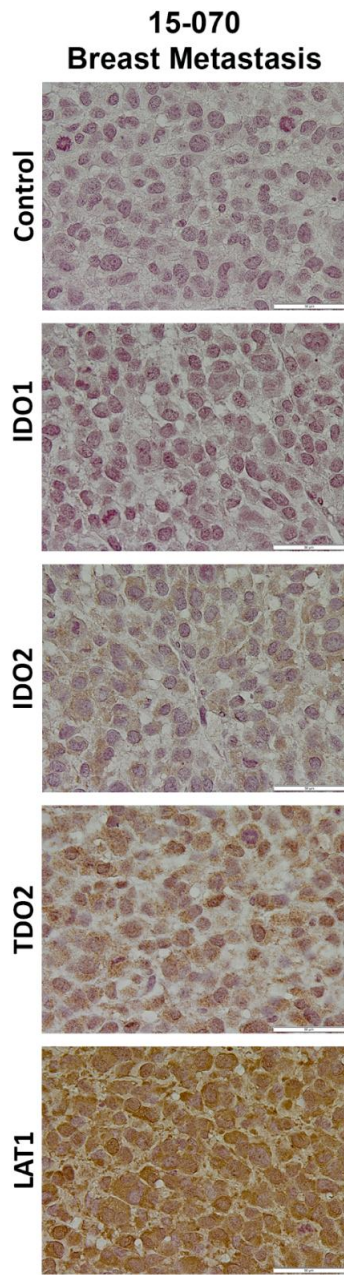

The 15-070 breast metastasis tumor tissue staining is representative of the staining for all five tumor models. The staining was performed as previously described (Guastella AR, Michelhaugh SK, Klinger NV, et al. *Tryptophan PET Imaging of the Kynurenine Pathway in Patient-Derived Xenograft Models of Glioblastoma. Mol Imaging. 2016;15;1-11*). Tissue staining for all five tumor models was scored independently by multiple investigators, and scores were averaged and given a 0, +, ++, or +++ score. Below is a table with the scores for each tumor model, as well as an averaged score for each target. Staining showed minimal IDO1, low IDO2, moderate TDO2, and abundant L-type amino acid transporter 1 (LAT1).

|                | IDO1     | IDO2     | TDO2     | LAT1       |
|----------------|----------|----------|----------|------------|
| <b>14-038</b>  | 0        | +        | +        | +++        |
| <b>14-112S</b> | +        | +        | ++       | ++         |
| <b>15-015</b>  | 0        | +        | +        | +++        |
| <b>15-037</b>  | 0        | +        | 0        | ++         |
| <b>15-070</b>  | +        | +        | ++       | +++        |
| <b>Average</b> | <b>0</b> | <b>+</b> | <b>+</b> | <b>+++</b> |
